# Supplementary figures and images for: Evolutionary Analysis of the Melon (Cucumis melo L.) GH3 Gene Family and Identification of GH3 Genes Related to Fruit Growth and Development
Source: MDPI journal article supplement (doi:10.3390/plants12061382), 2023-03-20

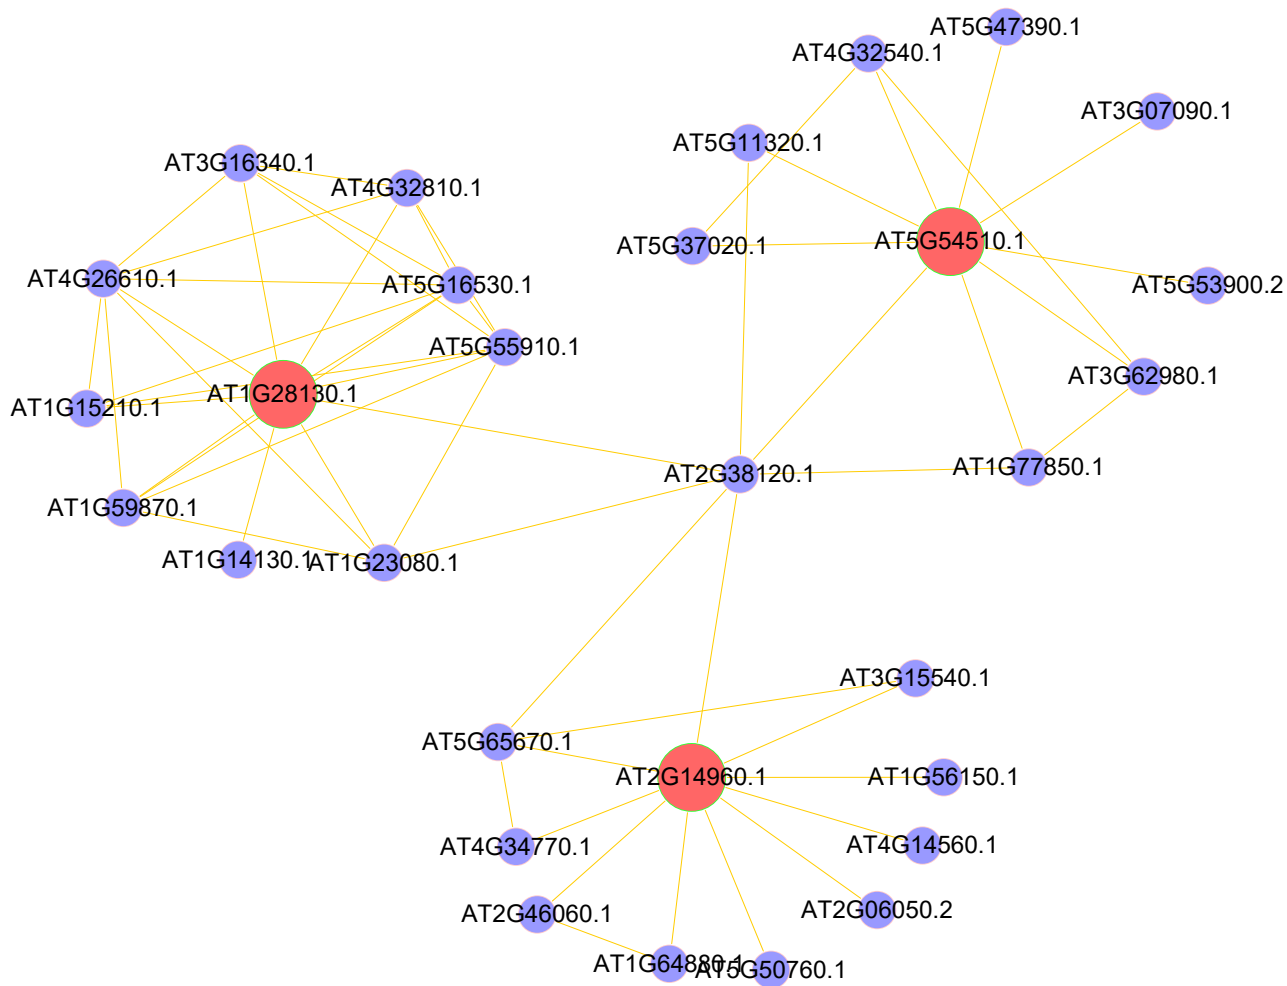

Supplement: s1 [file s1]

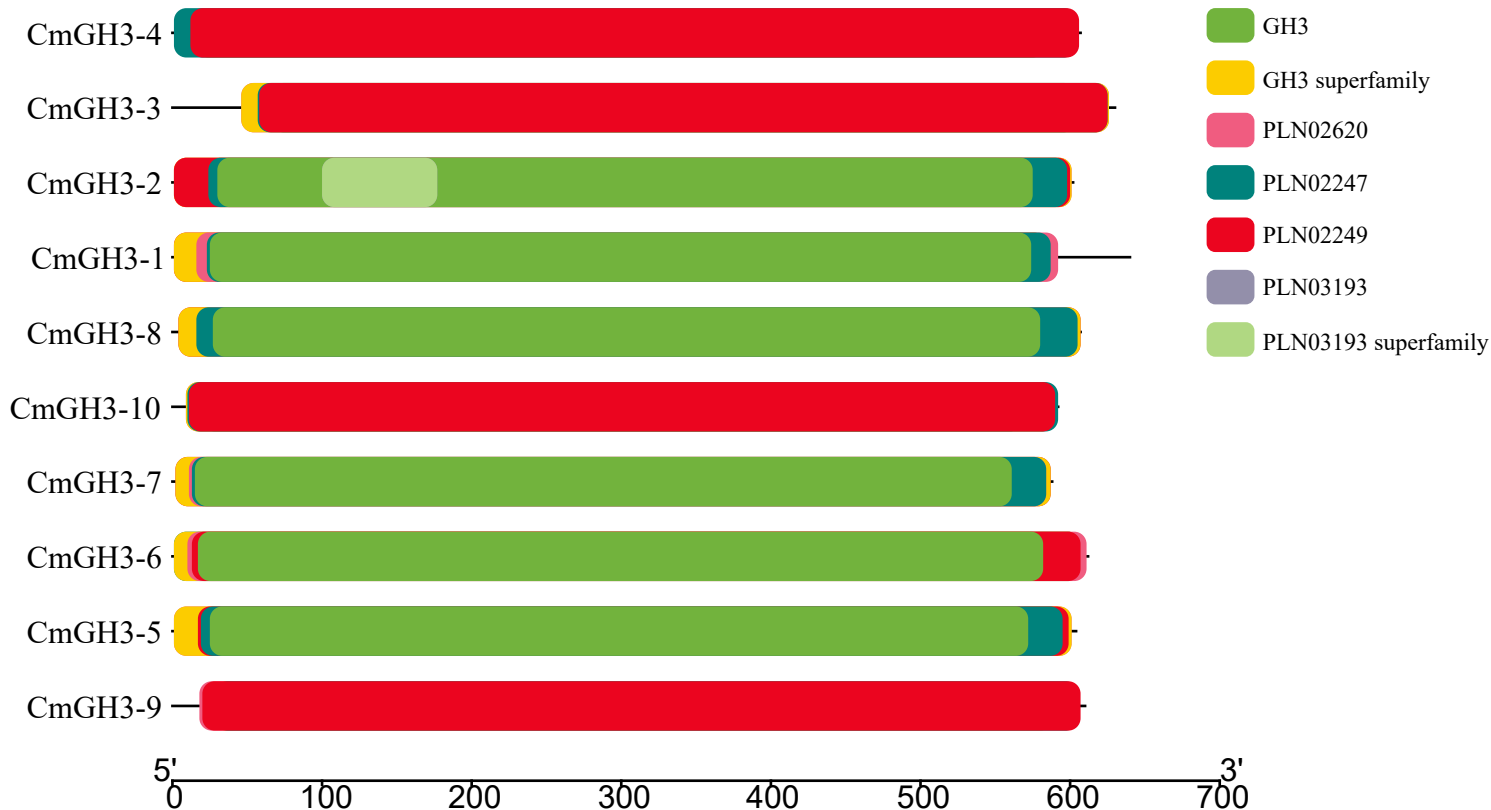

Supplement: s1 [file s1]

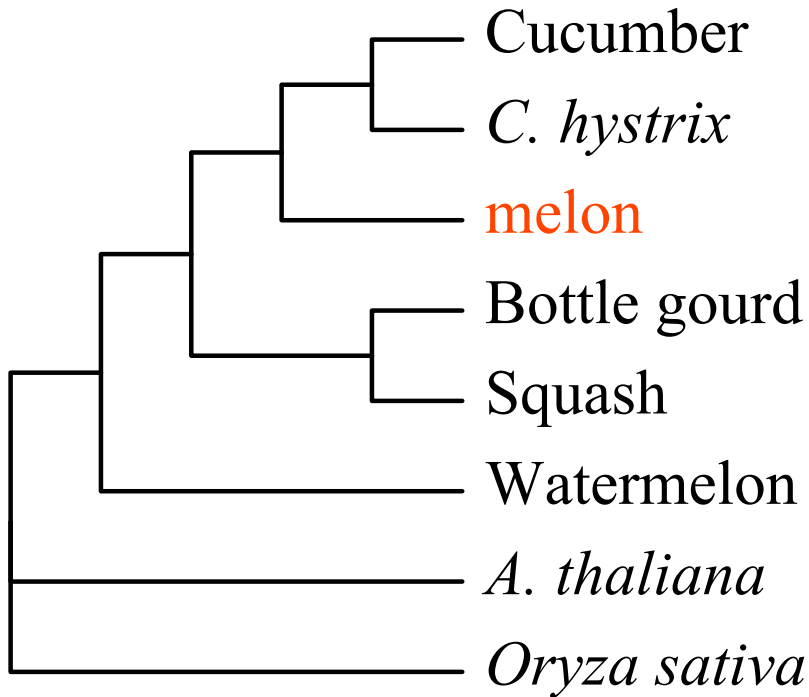

Supplement: s1 [file s1]
